# Supplementary material for: Transcriptomic signatures reveal a shift towards an anti-inflammatory gene expression profile but also the induction of type I and type II interferon signaling networks through aryl hydrocarbon receptor activation in murine macrophages
Source: Frontiers journal article supplement (doi:10.3389/fimmu.2023.1156493), 2023-05-23
Supplement: Image_1.PDF [file Image_1.PDF]

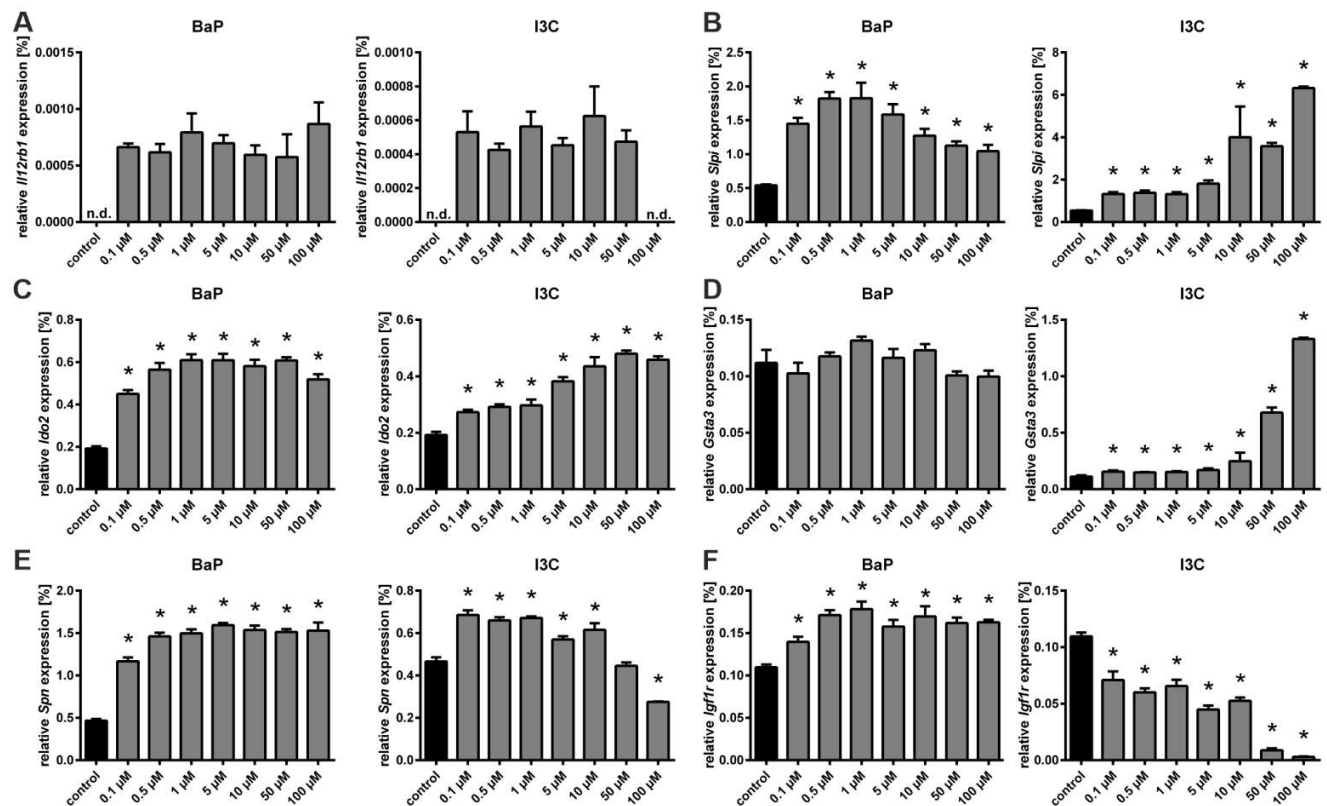

**Supplementary Figure 1.** BMMs from wild-type mice were treated with indicated concentrations of BaP and I3C, respectively, or DMSO as control for 6 h. Changes in gene transcription were assessed by real-time PCR after activation with hk-S.E. for 20 h. Relative *Il12rb1* (A), *Slpi* (B), *Ido2* (C), *Gsta3a* (D), *Spn* (E) and *Igf1r* (F) expression for BaP and I3C treatment. Data represent the mean of the relative expression  $\pm$  SEM after normalization with housekeeping genes *Alas1* and *Hprt* (n=4). \*  $p \leq 0.05$  indicates significant differences between treated and untreated cells.
